# Supplementary material for: Highly comparable metabarcoding results from MGI-Tech and Illumina sequencing platforms
Source: PeerJ. 2021 Sep 30;9:e12254. doi: 10.7717/peerj.12254 (PMC8491618; doi:10.7717/peerj.12254)
Supplement: Supplemental Information 4 — Number of sequences per sample after each bioinformatic process. [file peerj-09-12254-s004.xlsx]

## Sheet: Legend
Table S3. Number of sequences per sample after each bioinformatic process.

## Sheet: OTU workflow
SAMPLE	DNBSEQ							NovaSeq
	Demux reads	Reoriented	Assembled	PrimersCut	Qual.filt	Chimera filt	TOTAL LOSS %	Demux reads	Reoriented	Assembled	PrimersCut	Qual.filt	Chimera filt	TOTAL LOSS %
G5300	392379	327584	311541	264629	214426	213767	0.455203	270651	249204	237030	150441	138285	137980	0.490192
G5301	468346	373348	357415	307532	255836	254417	0.456776	373782	309965	294887	188927	176132	175496	0.530486
G5302	385581	325519	311790	268852	219301	218429	0.433507	313131	287014	273569	175877	160961	160311	0.488039
G5303	276777	229698	221098	190075	156307	154580	0.4415	219459	198529	189090	120452	110370	110092	0.498348
G5304	355888	300513	289852	249143	198708	197135	0.446076	300237	277521	265097	169750	155971	154971	0.483838
G5305	288128	239594	231134	199063	164659	163648	0.43203	231967	213525	203010	128515	116543	116193	0.499097
G5306	157003	131026	125581	107975	88357	88049	0.439189	127752	117234	111462	71976	66201	66100	0.482591
G5307	516825	434703	418384	356953	299454	296819	0.425688	399441	367331	350597	223849	209326	208979	0.476821
G5308	336840	244949	237566	203702	161062	160314	0.524065	221654	181702	173194	111252	103496	103161	0.534585
G5309	313608	263571	254581	217448	177619	176715	0.43651	248691	228769	218494	139664	130260	129831	0.477943
G5310	356358	301663	291019	251055	207644	206826	0.419612	315123	290800	277086	177078	161805	161461	0.487625
G5311	324710	274879	263102	225505	188789	188158	0.420535	259508	240110	228662	146063	133865	133611	0.485137
G5312	464442	392240	378688	325839	263106	261606	0.436731	319588	293705	279270	179517	165283	164535	0.485165
G5313	288042	241316	231892	199369	165005	164401	0.429246	228824	210098	199860	128375	118121	117849	0.48498
G5314	294612	246845	236970	204545	169940	169273	0.425438	235889	216755	206284	132012	119245	119015	0.495462
G5315	466816	401116	390077	334884	275084	272009	0.41731	398179	369811	351889	224566	207865	206810	0.48061
G5316	595121	505158	490210	423051	337600	335882	0.435607	420879	389149	371563	239359	224644	223809	0.468234
G5317	265832	226907	219674	189074	157689	156819	0.410082	214592	198467	189154	122152	113179	112800	0.474351
G5318	435073	368854	352550	303654	240256	239350	0.449862	364137	336782	320397	205084	188454	187978	0.483771
G5319	588741	502272	478076	409928	317527	315838	0.463537	498741	462811	440904	281541	259461	258334	0.482028
G5320	526192	449024	433829	374079	288688	286665	0.455208	343803	318279	303377	204728	192249	191709	0.442387
G5321	550817	470887	459729	394925	323305	320895	0.41742	445030	412960	393949	252058	235265	234507	0.473054
G5322	369852	277570	266238	229087	184532	184051	0.502366	261873	237653	226808	143831	132782	132040	0.495786
G5323	355287	301322	289411	249178	206672	205323	0.422093	280639	259487	247211	158655	143928	143592	0.488339
G5324	289555	238010	227254	194410	151634	151111	0.478127	199102	180087	171628	112210	104160	103805	0.478634
G5325	263916	221199	210168	180167	150561	150256	0.430667	205252	188790	180074	115874	107111	106858	0.479381
G5326	523956	448617	430150	372222	305711	303779	0.42022	411697	382320	364694	233510	211072	210122	0.48962
G5327	377476	314185	298596	256096	211580	210754	0.441676	294179	270910	258383	165154	152243	151527	0.484916
G5328	528542	449764	436494	375254	305633	303275	0.426205	375357	348373	332389	220890	206346	205739	0.451884
G5329	384885	326128	314939	269873	227292	225925	0.413006	357170	330232	315320	202197	187920	187195	0.475894
G5330	1315117	1126167	1089199	931821	746171	734011	0.441866	1071610	999033	952691	611171	555760	550226	0.486543
G5331	364580	308072	296194	253200	215514	214682	0.411153	294207	271985	259523	166362	153566	153168	0.479387
G5332	262975	214954	207305	177718	141325	140491	0.465763	201392	185155	176218	113594	105065	104483	0.481196
G5333	352772	299701	290671	248733	205946	204803	0.419447	294544	272429	260011	166879	152831	152060	0.483744
G5334	204295	169505	161279	137950	110369	109874	0.46218	169028	154705	147357	94227	87121	86987	0.485369
G5335	235470	196136	187348	159301	132781	132410	0.437678	192482	176998	168318	107469	99858	99523	0.482949
G5336	150114	123133	117938	99795	81743	81413	0.457659	128521	117631	112746	72618	67278	67159	0.477447
G5337	394381	332531	320245	275486	225277	224051	0.431892	328944	303260	288742	185147	172982	172281	0.47626
G5338	343740	290867	278363	242169	200719	199956	0.418293	277167	256196	243750	157051	144257	143889	0.480858
G5339	167917	139662	133875	115398	97537	97346	0.420273	126691	115692	110467	71024	66093	65931	0.479592
G5340	371881	314100	303635	261138	210850	209606	0.436363	228512	211195	201220	129967	121487	121019	0.470404
G5341	446588	378444	367795	314301	262936	261452	0.414557	368061	340150	324035	210043	195772	195237	0.469553
G5342	659830	560524	536870	462565	381777	379217	0.425281	512248	474747	452191	290751	265077	263888	0.484843
G5343	421807	355695	337929	290635	237130	235667	0.441292	347149	320033	304922	194573	179434	179057	0.484207
G5344	398841	339549	329367	283442	231836	231045	0.420709	279223	258594	246335	159899	147988	147614	0.47134
G5345	269958	228012	217571	185712	152385	151871	0.437427	210185	194015	184801	118056	109041	108768	0.482513
G5346	237824	200280	193255	166413	135814	135298	0.4311	199672	183289	174950	112567	104454	104250	0.477894
G5347	336859	288312	272748	233978	188867	187973	0.441983	272514	252199	241249	153390	141505	141041	0.482445
G5348	305979	260843	248456	212666	168032	167393	0.452927	232135	215330	205618	132181	122052	121819	0.475223
G5349	331557	284863	272454	235352	188490	187712	0.433847	244518	227174	216999	141326	132342	132011	0.460117
G5350	300277	256084	241664	207176	170677	169682	0.434915	252851	234421	223168	143046	131395	130833	0.482569
G5351	307379	263779	250449	216726	180953	180009	0.414374	243666	226309	215045	139864	126616	126313	0.481614
G5352	333554	285784	270435	231258	188327	187112	0.439035	228680	212449	202815	131576	122642	122193	0.465659
G5353	350007	296570	284647	242813	202627	201486	0.424337	265770	246241	235159	151658	141796	141222	0.468631
G5354	361189	310960	295631	253728	210643	208669	0.422272	293838	273108	260251	164946	152607	151883	0.483106
G5355	281049	236865	223258	190206	159976	159488	0.432526	253354	234706	223088	142593	129090	128787	0.491672
G5356	363080	307993	292930	251576	202763	201984	0.443693	279386	257347	244640	154704	143397	142627	0.489498
G5357	289161	245014	235575	200793	167349	166800	0.423159	256745	238134	227398	143322	132779	132280	0.484781
G5358	245273	211864	197454	171540	141468	140867	0.425673	212208	197655	188150	120883	112811	112629	0.469252
G5359	228480	189694	180909	155150	129844	129462	0.433377	179700	155780	148831	95369	89369	89223	0.503489
G5360	567985	485496	467123	398575	322753	320497	0.43573	445986	415521	396137	252910	232480	231912	0.480002
G5361	160267	136134	128831	111638	93644	92652	0.42189	148372	137482	130901	83946	76384	76099	0.487107
G5362	580896	502273	481311	409031	347687	343923	0.407944	544869	508729	484311	308269	281756	280359	0.485456
G5363	1041538	906928	870183	735880	624393	601770	0.422229	847898	796896	761800	485087	452316	440405	0.480592
G5364	1260742	1103892	1062184	902926	738479	726012	0.424139	938325	879938	840914	532078	491671	486129	0.481918
G5365	241039	204920	196744	169291	142689	142141	0.410299	227438	210942	201113	128930	119128	118754	0.477862
G5366	87317	75674	72230	61499	51200	50946	0.41654	70163	65696	63060	39950	36972	36850	0.474794
G5367	662800	576355	553258	478191	398571	394248	0.405178	499945	468232	446715	291644	271521	269621	0.460699
G5368	190390	161513	156552	131608	108754	108454	0.430359	140494	129184	123402	78801	73595	73440	0.477273
G5369	302442	259310	251092	217469	183159	182327	0.397151	281271	261938	249778	159275	146350	145957	0.481081
G5370	456745	354585	340021	287349	236909	235436	0.484535	399372	322457	307163	193748	179710	179157	0.551403
G5371	384252	327545	315544	272413	225393	223529	0.418275	305198	283584	269952	173473	160208	159810	0.476373
G5372	296405	256806	247787	213665	176664	175885	0.406606	207483	193489	184741	118462	109994	109714	0.471215
G5373	193379	167004	161220	138735	113550	112993	0.415691	177513	165576	157608	99782	91790	91535	0.484348
G5374	232421	192990	182118	154984	128935	128534	0.446978	217751	195714	186536	119473	110399	110135	0.494216
G5375	219287	192347	183757	158065	131500	130925	0.402951	192531	180556	172522	110464	101368	100999	0.475414
G5376	263560	226692	217809	186828	155776	155305	0.410741	187319	173495	165786	106673	98823	98287	0.475296
G5377	299590	264194	255993	217640	179432	177645	0.40704	273025	256756	245314	154409	143135	142020	0.479828
G5378	202597	172654	165127	142035	119030	118545	0.414873	168578	155985	148655	95153	88052	87791	0.479226
G5379	187589	158537	150993	129704	110963	110717	0.409789	154430	142574	136032	88168	81156	81008	0.475439
G5380	253658	215166	206579	175015	143059	142160	0.43956	178487	164983	157441	99253	91634	91283	0.488573
G5381	245268	208504	197358	169905	139714	138791	0.434125	238105	220511	210057	135351	125831	125336	0.47361
G5382	296996	252462	243465	203222	169916	169358	0.429763	244331	226229	215503	133956	124212	123723	0.493625
G5383	355901	304550	290654	250705	208613	207045	0.418251	282730	262372	249528	160764	147399	146566	0.481604
G5384	310256	263430	253349	215253	175888	174748	0.436762	217276	200591	191865	122198	114310	114138	0.474687
G5385	767731	600058	574035	496045	411213	407728	0.468918	768225	630316	600338	386674	354696	353119	0.540344
G5386	341608	292167	279568	241198	204437	202422	0.407444	295212	273857	260650	168918	156548	156084	0.471282
G5387	338868	285861	272896	234444	196652	196148	0.421167	280963	259573	247631	159316	146384	146042	0.480209
G5388	492541	421005	403957	349371	280707	279476	0.432583	356747	330113	314541	201571	186462	185904	0.478891
G5389	390312	332960	323963	276463	228159	226517	0.419651	345334	321582	306185	194156	179773	179008	0.481638
G5390	553233	475904	457807	393515	325845	322390	0.417262	467272	435189	415319	266885	248613	247425	0.47049
G5391	332243	282716	271116	233513	194423	192602	0.420298	262399	242611	231413	150080	139199	138766	0.471164
G5392	860268	744003	717146	618091	503901	498025	0.421082	646982	603849	576862	369142	345963	344083	0.468172
G5393	448704	364257	352458	304864	260996	259041	0.422691	398934	363212	346618	224774	208404	207435	0.480027
G5394	433586	369084	355423	306649	255603	254402	0.413261	360672	333814	318245	205678	192668	192034	0.467566
G5395	649053	533048	513830	440391	365570	361531	0.442987	501569	464065	443597	284588	266748	265507	0.470647
G5396	983857	852697	824056	711546	567103	560620	0.430181	648863	604510	575402	382510	350853	347203	0.464906
G5397	432941	369047	355130	303416	256114	254436	0.412308	470347	433682	412546	267768	246326	245462	0.478126
G5398	371987	317321	305207	261286	216004	214698	0.422835	303243	281416	268975	172409	160037	159316	0.474626
G5399	611215	523939	501362	431813	356665	354998	0.419193	468415	434745	414311	266331	246263	245254	0.476417
G5400	472360	404160	390750	334967	272657	271115	0.426042	349774	324011	308575	196013	180962	179981	0.485436
G5401	257226	214707	205042	175424	147725	147363	0.427107	255966	235815	225055	144862	134556	134094	0.476126
G5402	882964	757024	726896	627030	506097	502091	0.431357	777955	722310	685409	439867	385963	384395	0.50589
G5403	228589	195173	188162	161004	129717	128942	0.435922	188853	175673	167308	106898	97324	96980	0.486479
G5404	522369	444262	424819	366050	300700	299265	0.4271	387629	357730	340619	218302	202649	201722	0.4796
G5405	755570	635442	618504	525627	422567	419719	0.4445	511555	471693	464385	292237	270373	269609	0.472962
G5406	585754	485762	457295	394266	327063	325200	0.444818	446666	403740	397617	251312	234239	233286	0.477717
G5407	653041	559668	521250	449439	370801	368230	0.43613	528408	490609	482850	306774	282955	282309	0.465737
G5408	522995	441772	427006	366620	303220	301453	0.423603	405978	374655	367661	231802	211134	210657	0.481112
G5409	330765	277567	268155	232430	190959	190071	0.425359	307745	284388	279618	178236	162001	161347	0.475712
G5410	675105	571817	557461	476086	389980	386719	0.427172	483983	449139	441390	277529	253425	252244	0.478816
G5411	541118	464581	443850	382264	313882	312418	0.422643	449927	417578	410104	261456	242059	241001	0.464355
G5412	570278	479810	462280	393621	326060	322724	0.434094	417712	386532	380656	240654	224495	223904	0.463975
G5413	500547	410147	399779	344014	275752	274336	0.451928	333748	302369	297486	190760	177189	176470	0.471248
G5414	633701	540428	526799	450667	370048	366392	0.421822	461742	429023	422575	266143	248941	248020	0.46286
G5415	258882	216237	209083	179796	149027	148611	0.425951	225896	207635	204156	129301	118492	118222	0.476653
G5416	502859	427621	413162	355529	299469	297443	0.408496	396294	368193	361976	229580	210010	209280	0.471907
G5417	706273	602389	584599	502502	403197	399918	0.433763	450795	418903	412431	263394	242431	241379	0.464548
G5418	437756	369476	357777	307229	255825	254284	0.419119	361095	334461	329096	208931	191772	191111	0.470746
G5419	416447	353940	342433	293992	242781	241686	0.419648	326591	302921	297965	188530	171084	170608	0.47761
AVERAGE	417747	353587	339815	291576	239431	237629	0.430886	331781	305531	292687	187478	173002	172209	0.480725
SumSeqs	50129600	42430429	40777795	34989094	28731693	28515499		39813707	36663675	35122419	22497411	20760193	20665100

## Sheet: ASV workflow
SAMPLE	DNBSEQ					NovaSeq
	reads in (reoriented, primers clipped)	Qual.filt	Qual.filt loss%	final reads in ASV table	TOTAL LOSS %	reads in (reoriented, primers clipped)	Qual.filt	Qual.filt loss%	final reads in ASV table	TOTAL LOSS %
G5300	327489	234081	0.285225	218992	0.3313	249149	177683	0.28684	166130	0.33321
G5301	373253	282560	0.24298	264858	0.290406	309903	221573	0.285025	205668	0.336347
G5302	325465	241954	0.25659	226522	0.304005	286956	203034	0.292456	188938	0.341578
G5303	229610	176512	0.231253	167510	0.270459	198483	138420	0.30261	130970	0.340145
G5304	300454	223889	0.254831	210407	0.299703	277466	199649	0.280456	187959	0.322587
G5305	239538	189095	0.210585	178384	0.2553	213477	147008	0.311364	136664	0.359819
G5306	130974	97029	0.259174	89896	0.313635	117198	83290	0.289322	76701	0.345543
G5307	434567	333192	0.233278	320378	0.262765	367221	265565	0.276825	253444	0.309832
G5308	244901	180201	0.264188	171663	0.299051	181675	130135	0.283693	122636	0.32497
G5309	263481	200215	0.240116	189041	0.282525	228726	166399	0.272496	156096	0.317542
G5310	301557	227691	0.244949	214481	0.288755	290706	204955	0.294975	190893	0.343347
G5311	274785	212716	0.225882	197880	0.279873	240020	169238	0.2949	155628	0.351604
G5312	392130	291589	0.256397	278108	0.290776	293662	205928	0.298758	194434	0.337899
G5313	241247	179480	0.256032	168674	0.300824	210040	147505	0.297729	138336	0.341383
G5314	246777	190286	0.228915	177586	0.280379	216720	151616	0.300406	140447	0.351943
G5315	400948	314226	0.216292	306577	0.23537	369690	258332	0.30122	251678	0.319219
G5316	504902	372626	0.261984	360855	0.285297	389074	282522	0.27386	272276	0.300195
G5317	226783	174242	0.23168	168135	0.258608	198420	141427	0.287234	137227	0.308401
G5318	368776	272952	0.259843	256535	0.304361	336723	236257	0.298364	220771	0.344354
G5319	502166	370488	0.26222	349152	0.304708	462720	328694	0.289648	310271	0.329463
G5320	448900	327344	0.270786	310540	0.30822	318209	228030	0.283396	213383	0.329425
G5321	470814	358946	0.237606	346996	0.262987	412901	294810	0.286003	284249	0.311581
G5322	277436	203065	0.268065	193167	0.303742	237596	169499	0.286608	159955	0.326777
G5323	301233	220367	0.26845	207970	0.309604	259436	182918	0.29494	170503	0.342794
G5324	237915	170425	0.283673	159321	0.330345	180059	128495	0.286373	119971	0.333713
G5325	221121	170019	0.231104	157963	0.285626	188748	134866	0.285471	124369	0.341084
G5326	448507	337030	0.248551	317513	0.292067	382237	268083	0.298647	250528	0.344574
G5327	314062	236793	0.246031	220478	0.297979	270863	193145	0.286927	179093	0.338806
G5328	449639	341062	0.241476	325351	0.276417	348299	250840	0.279814	237544	0.317988
G5329	326037	251983	0.227134	237910	0.270298	330187	237519	0.280653	223781	0.32226
G5330	1125961	859068	0.237036	828558	0.264133	998903	719601	0.279609	691003	0.308238
G5331	307627	237078	0.229333	223192	0.274472	271916	194046	0.286375	180549	0.336012
G5332	214883	157159	0.26863	147690	0.312696	185110	131775	0.288126	123089	0.335049
G5333	299619	226961	0.242501	214603	0.283747	272380	193850	0.28831	181439	0.333875
G5334	169450	124507	0.265229	114899	0.32193	154665	109925	0.28927	102352	0.338234
G5335	196051	150437	0.232664	139453	0.28869	176924	124301	0.297433	113079	0.360861
G5336	123104	83556	0.321257	78725	0.3605	117617	87168	0.258883	82550	0.298146
G5337	332426	251761	0.242656	239772	0.278721	303205	217657	0.282146	206665	0.318398
G5338	290532	219913	0.243068	204961	0.294532	256120	180341	0.295873	165703	0.353026
G5339	139548	108344	0.223608	99693	0.285601	115662	83181	0.280827	75073	0.350928
G5340	313873	223827	0.286887	214513	0.316561	211146	151957	0.280323	144233	0.316904
G5341	378079	291065	0.230148	276162	0.269565	340014	243071	0.285115	229112	0.326169
G5342	559648	429484	0.232582	406844	0.273036	474666	333830	0.296705	315410	0.335512
G5343	355577	269649	0.241658	251803	0.291847	319966	225251	0.296016	209446	0.345412
G5344	339463	258710	0.237885	241516	0.288535	258543	184210	0.287507	169740	0.343475
G5345	227901	174116	0.236002	160384	0.296256	193927	138001	0.288387	126786	0.346218
G5346	200226	149786	0.251915	143162	0.284998	183245	131132	0.28439	124781	0.319048
G5347	288231	207309	0.280754	193921	0.327203	252146	182666	0.275555	170023	0.325696
G5348	260288	184530	0.291055	172927	0.335632	215273	154951	0.280212	144699	0.327835
G5349	284800	214122	0.248167	200881	0.294659	227128	163015	0.282277	150546	0.337176
G5350	255985	194825	0.23892	179637	0.298252	234353	165500	0.2938	152866	0.347711
G5351	263704	206087	0.218491	190305	0.278339	226269	158132	0.301133	144163	0.362869
G5352	285687	212151	0.257401	195289	0.316423	212381	154014	0.274822	142521	0.328937
G5353	296487	210985	0.288384	198992	0.328834	246190	177227	0.280121	166720	0.322799
G5354	310860	223828	0.279972	209074	0.327434	273041	194036	0.289352	181500	0.335265
G5355	236805	176535	0.254513	162747	0.312738	234651	160118	0.317633	147775	0.370235
G5356	307820	234142	0.239354	222839	0.276074	257242	181472	0.294548	175888	0.316255
G5357	244923	178476	0.271298	168158	0.313425	238088	171202	0.28093	161541	0.321507
G5358	211806	165445	0.218884	149754	0.292966	197619	140555	0.288758	128175	0.351403
G5359	189632	142436	0.248882	131815	0.304891	155746	112916	0.274999	103342	0.336471
AVERAGE	313941	235806	0.250074	222585	0.294468	269512	191876	0.288107	180189	0.333634
