# Supplementary material for: Highly comparable metabarcoding results from MGI-Tech and Illumina sequencing platforms
Source: PeerJ. 2021 Sep 30;9:e12254. doi: 10.7717/peerj.12254 (PMC8491618; doi:10.7717/peerj.12254)
Supplement: Supplemental Information 5 — Data appears in Figure 1. [file peerj-09-12254-s005.xlsx]

## Sheet: Legend
Table S4. Quality score estimates for a sample G5300. Data is displayed in Figure 1 in the manuscript.

## Sheet: Table S4
Expecter error rate per read
	Platform	Data	Read	Min.	1st Qu.	Median	Mean	3rd Qu.	Max.
Fig. 1	dnb	Raw	R1	0.00440913	0.082989	0.190142	0.447582	0.48084	10.8734
	nov	Raw	R1	0.0229154	0.138572	0.243901	0.636421	0.625822	23.7995
	dnb	qual.filt.	R1	0.00606717	0.0532094	0.0729266	0.0969823	0.110504	1.31254
	nov	qual.filt.	R1	0.00638484	0.0571133	0.116304	0.123197	0.151638	0.859961
	dnb	Raw	R2	0.00432065	0.110412	0.35381	0.821401	0.947094	12.1135
	nov	Raw	R2	0.0474872	0.226693	0.463825	0.943353	1.05458	128.892
	dnb	qual.filt.	R2	0.00713087	0.0542284	0.0751574	0.102901	0.117541	1.36096
	nov	qual.filt.	R2	0.00638484	0.0617326	0.127458	0.13744	0.198022	0.804061
Bases with score <20
	Platform	Data	Read	Min.	1st Qu.	Median	Mean	3rd Qu.	Max.
Fig. 1	dnb	Raw	R1	0	1	2	4.75578	5	80
	nov	Raw	R1	0	1	2	6.97986	7	185
	dnb	qual.filt.	R1	0	0	1	0.84298	1	8
	nov	qual.filt.	R1	0	0	1	0.891642	1	10
	dnb	Raw	R2	0	1	4	8.26438	10	80
	nov	Raw	R2	0	2	5	10.6764	12	215
	dnb	qual.filt.	R2	0	0	1	0.911362	1	9
	nov	qual.filt.	R2	0	0	1	1.09083	2	9
