# Supplementary material for: Highly comparable metabarcoding results from MGI-Tech and Illumina sequencing platforms
Source: PeerJ journal article supplement (doi:10.7717/peerj.12254), 2021-09-30
Supplement: Supplemental_Data_1.zip [file Supplemental_Data_1.zip]

**OTU\_taxonomy.xlsx** – OTUs with sequence length 313  $\pm$  4 bp supplied with blastn hits against CO1Classifier database v4. **OTU identifiers are uniform across all data matrices.**

**matrix1\_DNBSEQ.txt** – the formed OTU table after clustering filtered reads with 97% similarity threshold with vsearch. Contains data only from **DNBSEQ** platform, corresponds to matrix#1 in the manuscript.

**matrix1\_DNBSEQ\_tagJump\_filt.txt** – the formed OTU table after clustering filtered reads with 97% similarity threshold with vsearch and applying UNCROSS2 index-switching error correction algorithm. Contains data only from **DNBSEQ** platform.

**matrix1\_NovaSeq.txt** – the formed OTU table after clustering filtered reads with 97% similarity threshold with vsearch. Contains data only from **NovaSeq** platform, corresponds to matrix#1 in the manuscript.

**matrix1\_NovaSeq\_tagJump\_filt.txt** – the formed OTU table after clustering filtered reads with 97% similarity threshold with vsearch and applying UNCROSS2 index-switching error correction algorithm. Contains data only from **NovaSeq** platform.

**matrix2\_DNBSEQ.txt** – an OTU table derived by removing global singletons from “Full\_raw\_dataset\_with\_TAX”. Contains data only from **DNBSEQ** platform, corresponds to matrix#2 in the manuscript.

**matrix2\_DNBSEQ\_tagJump\_filt.txt** – an OTU table derived by removing global singletons from “Full\_raw\_dataset\_with\_TAX” and applying UNCROSS2 index-switching error correction algorithm. Contains data only from **DNBSEQ** platform.

**matrix2\_NovaSeq.txt** – an OTU table derived by removing global singletons from “Full\_raw\_dataset\_with\_TAX”. Contains data only from **NovaSeq** platform, corresponds to matrix#2 in the manuscript.

**matrix2\_NovaSeq\_tagJump\_filt.txt** – an OTU table derived by removing global singletons from “Full\_raw\_dataset\_with\_TAX” and applying UNCROSS2 index-switching error correction algorithm. Contains data only from **NovaSeq** platform.

**matrix3\_DNBSEQ.txt** – an OTU table derived by keeping only potential Metazoan OTUs from matrix#2. See methods section for Metazoan OTU selection. Contains data only from **DNBSEQ** platform, corresponds to matrix#3 in the manuscript.

**matrix3\_DNBSEQ\_tagJump\_filt.txt** – an OTU table derived by keeping only potential Metazoan OTUs from matrix#2 and applying UNCROSS2 index-switching error correction algorithm. See methods section for Metazoan OTU selection. Contains data only from **DNBSEQ** platform.

**matrix3\_NovaSeq.txt** – an OTU table derived by keeping only potential Metazoan OTUs from matrix#2. See methods section for Metazoan OTU selection. Contains data only from **NovaSeq** platform, corresponds to matrix#3 in the manuscript.

**matrix3\_NovaSeq\_tagJump\_filt.txt** – an OTU table derived by keeping only potential Metazoan OTUs from matrix#2 and applying UNCROSS2 index-switching error correction algorithm. See methods section for Metazoan OTU selection. Contains data only from **NovaSeq** platform.

**matrix4\_DNBSEQ.txt** – an OTU table derived by subjecting matrix#3 to rarefaction, to a depth of 10,489 reads per sample. Contains data only from **DNBSEQ** platform, corresponds to matrix#4 in the manuscript.

**matrix4\_DNBSEQ\_tagJump\_filt.txt** – an OTU table derived by subjecting matrix#3 to rarefaction (10,489 reads per sample) and applying UNCROSS2 index-switching error correction algorithm. Contains data only from **DNBSEQ** platform.

**matrix4\_NovaSeq.txt** – an OTU table derived by subjecting matrix#3 to rarefaction, to a depth of 10,489 reads per sample. Contains data only from **NovaSeq** platform, corresponds to matrix#4 in the manuscript.

**matrix4\_NovaSeq\_tagJump\_filt.txt** – an OTU table derived by subjecting matrix#3 to rarefaction (10,489 reads per sample) and applying UNCROSS2 index-switching error correction algorithm. Contains data only from **NovaSeq** platform.

**matrix5\_DNBSEQ\_HighID\_metazoa.txt** – an OTU table derived by keeping only abundant and high identity Metazoan OTUs (with relative sequence abundance of  $\geq 0.01\%$  and  $\geq 98\%$  sequence similarity to the reference sequences) from matrix#4. Contains data only from **DNBSEQ** platform, corresponds to matrix#5 in the manuscript.

**matrix5\_NovaSeq\_HighID\_metazoa.txt** – an OTU table derived by keeping only abundant and high identity Metazoan OTUs (with relative sequence abundance of  $\geq 0.01\%$  and  $\geq 98\%$  sequence similarity to the reference sequences) from matrix#4. Contains data only from **NovaSeq** platform, corresponds to matrix#5 in the manuscript.

**ASV\_matrix.xlsx** – the formed ASV table with DADA2 pipeline (see file **Bioinformatics.sh**). Contains data from **DNBSEQ** and **NovaSeq** platforms; subset of 60 samples (see Table S1).

**post-clustered\_ASVs\_matrix.txt** – post-clustered ASVs matrix by subjecting ‘**ASV\_matrix**’ to LULU post-clustering with 97% sequence similarity threshold. Contains data from **DNBSEQ** and **NovaSeq** platforms; subset of 60 samples (see Table S1).

**Bioinformatics.sh** – codes for all the bioinformatics processing of the sequencing data.

**R\_codes.pdf** – R codes for data analyses.

**TagJump\_code.R** – R codes for calculating index-switches.
